# Supplementary material for: Hepatoma-Derived Growth Factor Upregulation Is Correlated with Prognostic Factors of Early-Stage Cervical Adenocarcinoma
Source: MDPI journal article supplement (doi:10.3390/ijms151121492), 2014-11-21
Supplement: s1 [file s1]

## Supplementary Information

**Figure S1.** Differential nuclear and cytoplasm HDGF expression in tumor and non-tumor specimens from patients with cervical adenocarcinoma (Cx). **(A)** Western blot analysis. Protein extracts were isolated from Cx tissue and subjected to western blot analysis using HDGF antibodies (1:1000 dilutions). As an internal control, the  $\beta$ -actin level was also determined; **(B)** Quantification. \*\* Indicates that the difference compared to the non-tumor samples was statistically significant at  $p < 0.01$ .

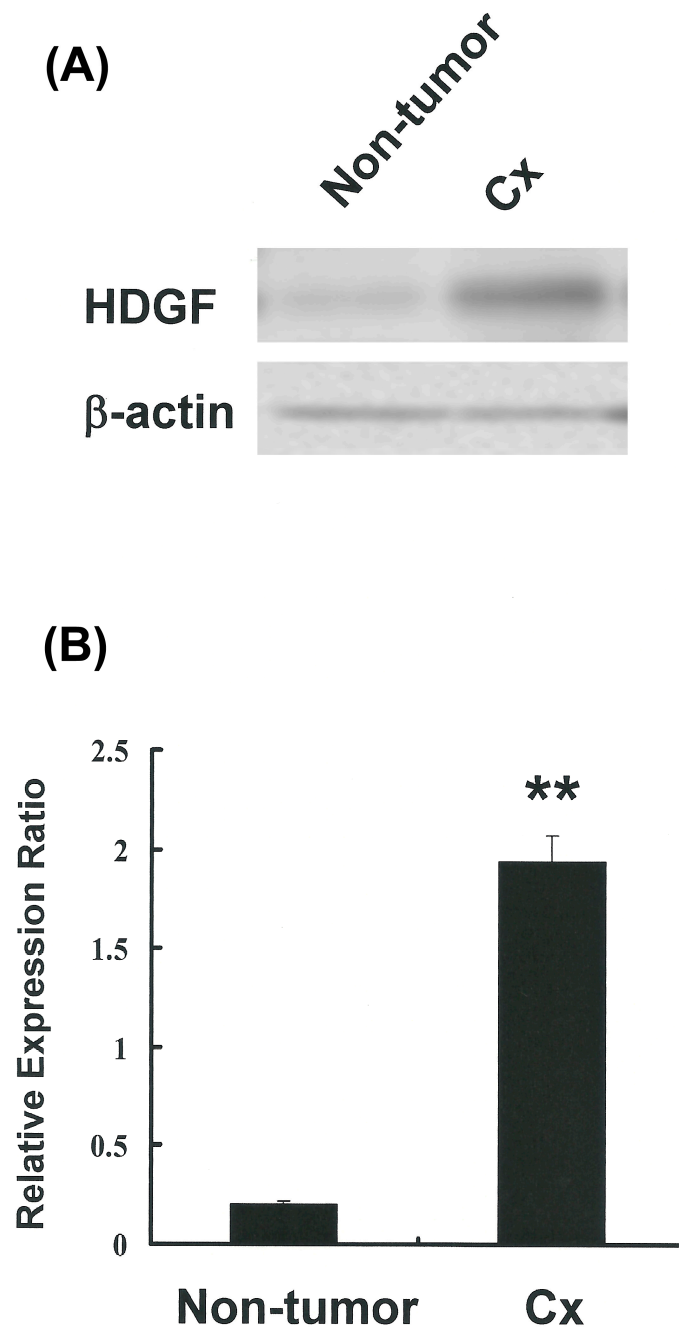

**Figure S2.** An *in vitro* study was performed by treating each of the Hela cells with increasing doses of HDGF (0, 0.02 and 0.2 nM) for 24 to 72 h. The survival of the HDGF-treated cancer cells was then measured using the MTT method. The results are expressed as a percentage of the control, which was considered to be 100%. All data are reported as the mean ( $\pm$ SEM) of at least three separate experiments. Statistical analysis was performed using a *t*-test, with significant differences determined at the level of \*  $p < 0.05$  versus the control group (HDGF 0 nM group).

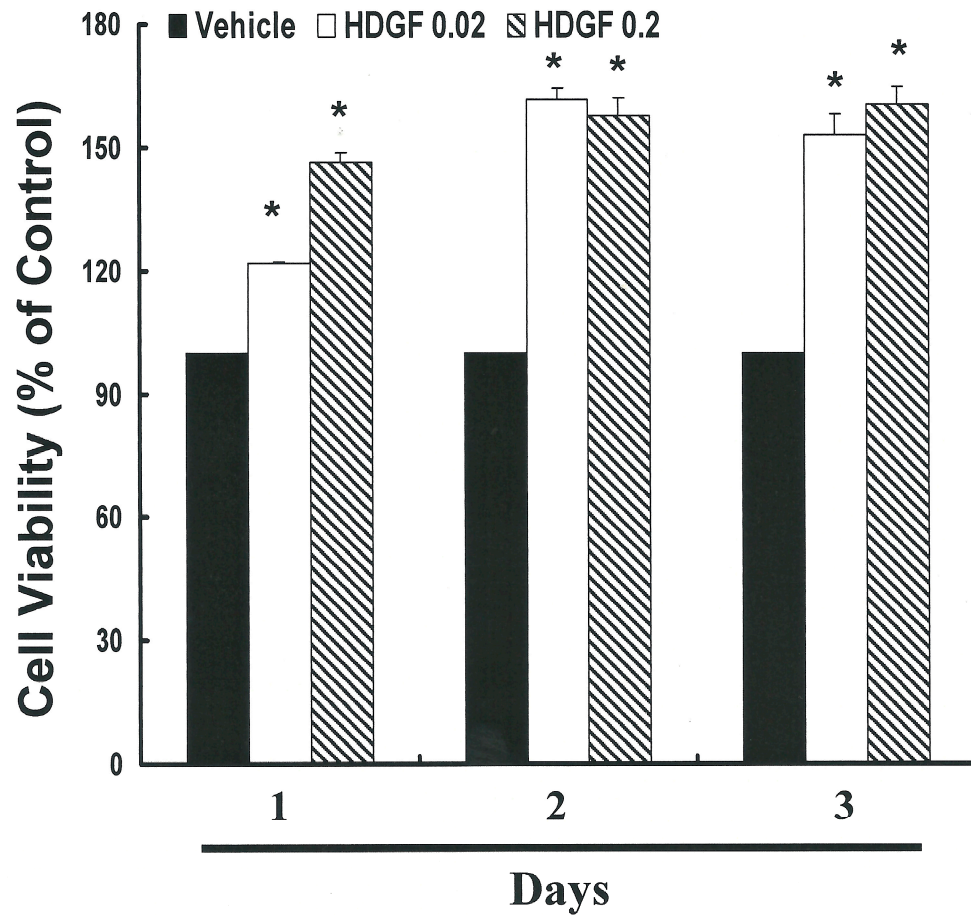

**Figure S3.** Differential colony formation and invasion capability among human primary cervical and cancer cells as assessed by the colony formation and invasion assay.

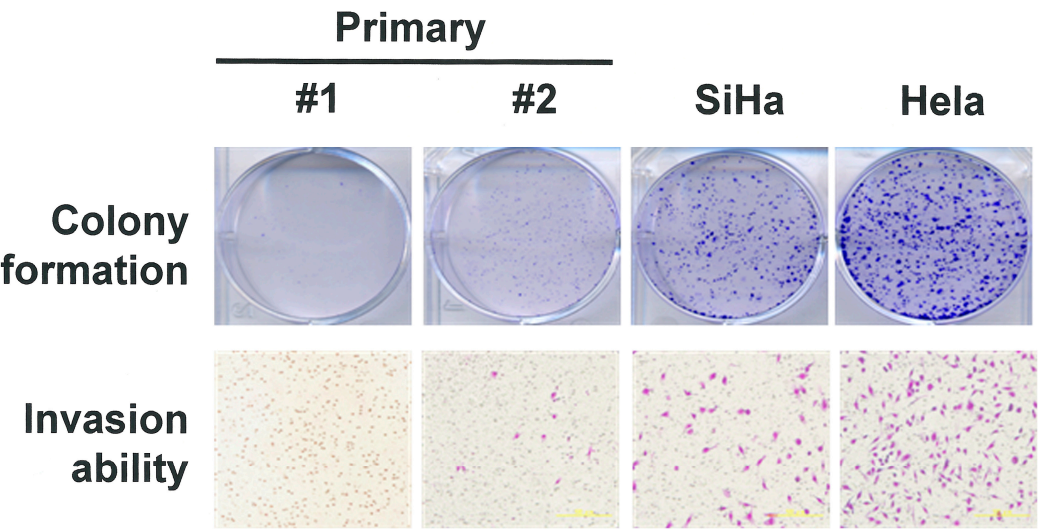

**Figure S4.** Colony-forming capability and invasion assay among human primary cervical and cancer cells as determined by the colony formation assay. \*\*  $p < 0.01$  versus primary cells.

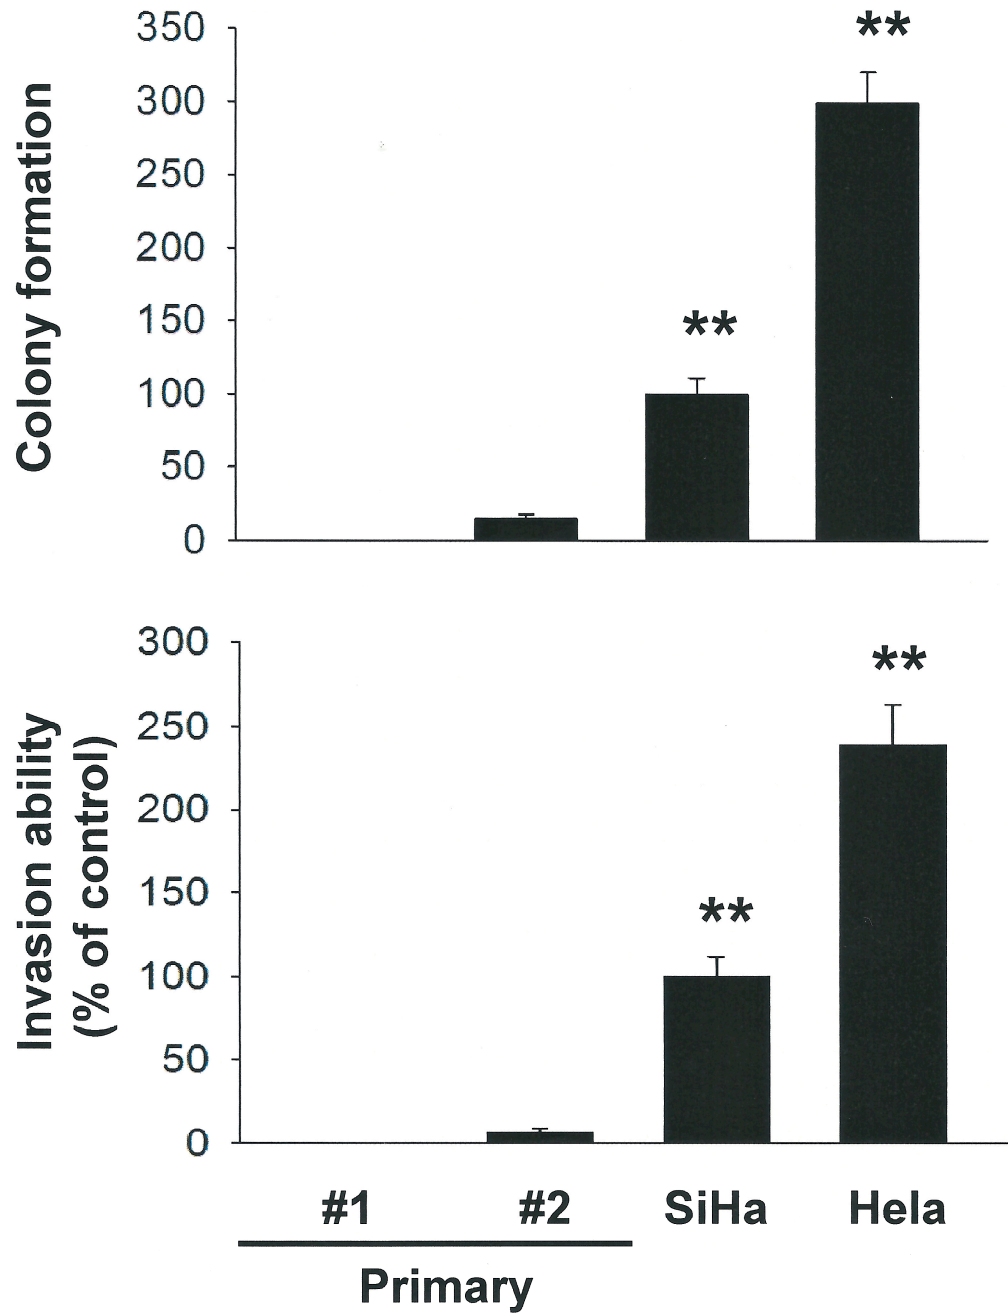

**Figure S5.** Effect of ectopic HDGF overexpression and knockdown on the tumorigenic behaviors of cervical cancer cells. After infection with various adenovirus vectors at a MOI of 200 for 72 hours, HeLa cells were harvested for subsequent analysis. **(A)** Immunoblot analysis of HDGF protein level after infection with various adenovirus vectors. The anti-6XHis antibody detected the presence of exogenous HDGF with a molecular weight of 42 kDa; **(B)** Effect of gene delivery with various adenovirus vectors on colony formation and invasion. The invasion capability was assessed by the Boyden chamber assay; **(C)** Effect of gene delivery with various adenovirus vectors on colony formation and invasion. \*\*  $p < 0.01$  versus PBS group, \*  $p < 0.01$  versus the Ad-GFP group and #  $p < 0.01$  versus the Ad-HDGF group.

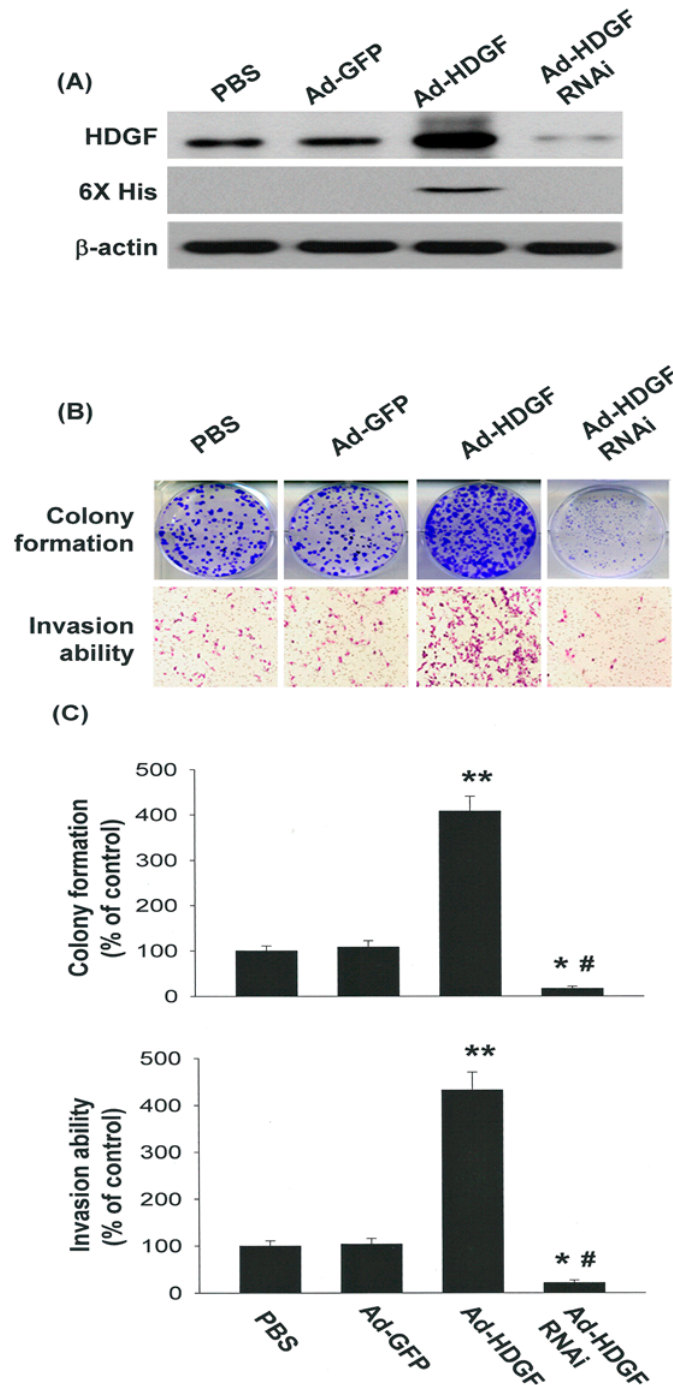

**Table S1A.** Histopathological characteristics of the patients studied.

| <b>Factor</b>             | <b>N</b> | <b>Means of HDGF (nu)</b> |
|---------------------------|----------|---------------------------|
| FIGO stage                |          |                           |
| 1b                        | 52       | 65.9 ± 29.6               |
| IIa                       | 11       | 74.5 ± 20.2               |
| Histological Subtype      |          |                           |
| Serous AD                 | 47       | 68.1 ± 27.6               |
| AS                        | 5        | 63.0 ± 36.7               |
| Other                     | 11       | 66.4 ± 29.8               |
| Grade                     |          |                           |
| WD (1)                    | 12       | 65.4 ± 33.3               |
| MD (2)                    | 37       | 68.6 ± 25.5               |
| PD (3)                    | 14       | 65.7 ± 32.5               |
| Tumor size                |          |                           |
| ≤2 cm                     | 27       | 66.3 ± 30.0               |
| >2 cm                     | 36       | 68.2 ± 27.3               |
| ≤4 cm                     | 58       | 67.8 ± 28.1               |
| >4 cm                     | 5        | 62.0 ± 32.7               |
| LVSI                      |          |                           |
| (+)                       | 27       | 76.5 ± 19.4 *             |
| (-)                       | 36       | 60.6 ± 32.0               |
| PM invasion               |          |                           |
| (+)                       | 57       | 66.6 ± 29.0               |
| (-)                       | 6        | 75.0 ± 19.7               |
| Depth of stromal Invasion |          |                           |
| <2/3                      | 34       | 60.7 ± 32.5               |
| >2/3                      | 29       | 75.2 ± 20.1               |
| LN                        |          |                           |
| (+)                       | 9        | 73.3 ± 26.0               |
| (-)                       | 54       | 66.4 ± 28.7               |
| Recurrence                |          |                           |
| (+)                       | 22       | 78.9 ± 19.0 *             |
| (-)                       | 41       | 61.2 ± 30.6               |
| CD31                      | 63       | r = 0.419 <sup>#,*</sup>  |
| CEA                       | 63       | r = 0.004 <sup>#</sup>    |

<sup>#</sup> Wilcoxon rank sum test; \*  $p < 0.05$ . FIGO, International Federation of Gynecologists & Obstetricians; AD, adenocarcinoma; AS, adenosquamous carcinoma; WD, well differentiation; MD, moderate differentiation; PD, poor differentiation; LVSI: lymphovascular space Involvement; PM, parametrium; LN, lymph node invasion; CD, cluster of differentiation; CEA, Carcinoembryonic antigen.

**Table S1B.** Histopathological characteristics of the patients studied.

| <b>Factor</b>             | <b>N</b> | <b>Means of HDGF (cy)</b> |
|---------------------------|----------|---------------------------|
| FIGO stage                |          |                           |
| 1b                        | 52       | 26.2 ± 34.6               |
| IIa                       | 11       | 18.2 ± 21.4               |
| Histological Subtype      |          |                           |
| Serous AD                 | 47       | 23.8 ± 32.2               |
| AS                        | 5        | 26.0 ± 36.5               |
| Other                     | 11       | 28.2 ± 36.0               |
| Grade                     |          |                           |
| WD (1)                    | 12       | 14.2 ± 24.6               |
| MD (2)                    | 37       | 30.0 ± 35.4               |
| PD (3)                    | 14       | 20.0 ± 30.1               |
| Tumor size                |          |                           |
| ≤2 cm                     | 27       | 20.4 ± 28.2               |
| >2 cm                     | 36       | 28.1 ± 35.7               |
| ≤4 cm                     | 58       | 24.3 ± 32.7               |
| >4 cm                     | 5        | 30.0 ± 35.4               |
| LVSI                      |          |                           |
| (+)                       | 27       | 28.5 ± 36.1               |
| (-)                       | 36       | 21.9 ± 30.0               |
| PM invasion               |          |                           |
| (+)                       | 57       | 22.6 ± 30.7               |
| (-)                       | 6        | 45.0 ± 45.9               |
| Depth of stromal Invasion |          |                           |
| <2/3                      | 34       | 16.8 ± 26.8               |
| >2/3                      | 29       | 34.1 ± 36.7               |
| LN                        |          |                           |
| (+)                       | 9        | 21.1 ± 30.5 *             |
| (-)                       | 54       | 46.7 ± 38.4               |
| Recurrence                |          |                           |
| (+)                       | 22       | 16.1 ± 28.2 *             |
| (-)                       | 41       | 40.9 ± 34.9               |
| CD31                      | 63       | r = 0.567 #,*             |
| CEA                       | 63       | r = -0.033 #              |

# Wilcoxon rank sum test; \*  $p < 0.05$ . Note: FIGO, International Federation of Gynecologists & Obstetricians; AD, adenocarcinoma; AS, adenosquamous carcinoma; WD, well differentiation; MD, moderate differentiation; PD, poor differentiation; LVSI: lymphovascular space Involvement; PM, parametrium; LN, lymph node invasion; CD, cluster of differentiation; CEA, Carcinoembryonic antigen.
